# Supplementary material
Source: MDPI journal article supplement (https://www.mdpi.com/1424-2818/12/11/433)
Supplement: s1 [file s1]

## Supplementary Materials

**Table S1.** Sampling information during the cruises in May and July 2019 in Taiwan Strait.

| Station | Coordinates |            | Sampling time        |                       |
|---------|-------------|------------|----------------------|-----------------------|
| M01     | 119°59'4" E | 26°20'9" N | 03:27, 30, May, 2019 |                       |
| M03     | 120°17'0" E | 26°16'8" N | 05:45, 30, May, 2019 |                       |
| M05     | 120°33'9" E | 26°12'3" N | 07:52, 30, May, 2019 |                       |
| M13     | 120°02'2" E | 26°00'0" N | 22:42, 29, May, 2019 | 18:22, 31, July, 2019 |
| M15     | 120°20'0" E | 25°55'2" N | 11:05, 30, May, 2019 | 15:56, 31, July, 2019 |
| P01     | 119°55'6" E | 25°34'1" N | 19:00, 29, May, 2019 |                       |
| P03     | 120°07'6" E | 25°30'3" N | 16:31, 30, May, 2019 | 10:06, 31, July, 2019 |
| P05     | 120°18'4" E | 25°26'7" N | 14:45, 30, May, 2019 | 12:12, 31, July, 2019 |
| P11     | 119°24'6" E | 25°11'0" N | 01:36, 31, May, 2019 | 23:05, 30, July, 2019 |
| P13     | 119°34'0" E | 25°06'0" N |                      | 05:12, 31, July, 2019 |
| P15     | 119°48'0" E | 25°00'8" N | 22:00, 30, May, 2019 |                       |
| P17     | 119°57'9" E | 24°57'0" N | 20:30, 30, May, 2019 |                       |





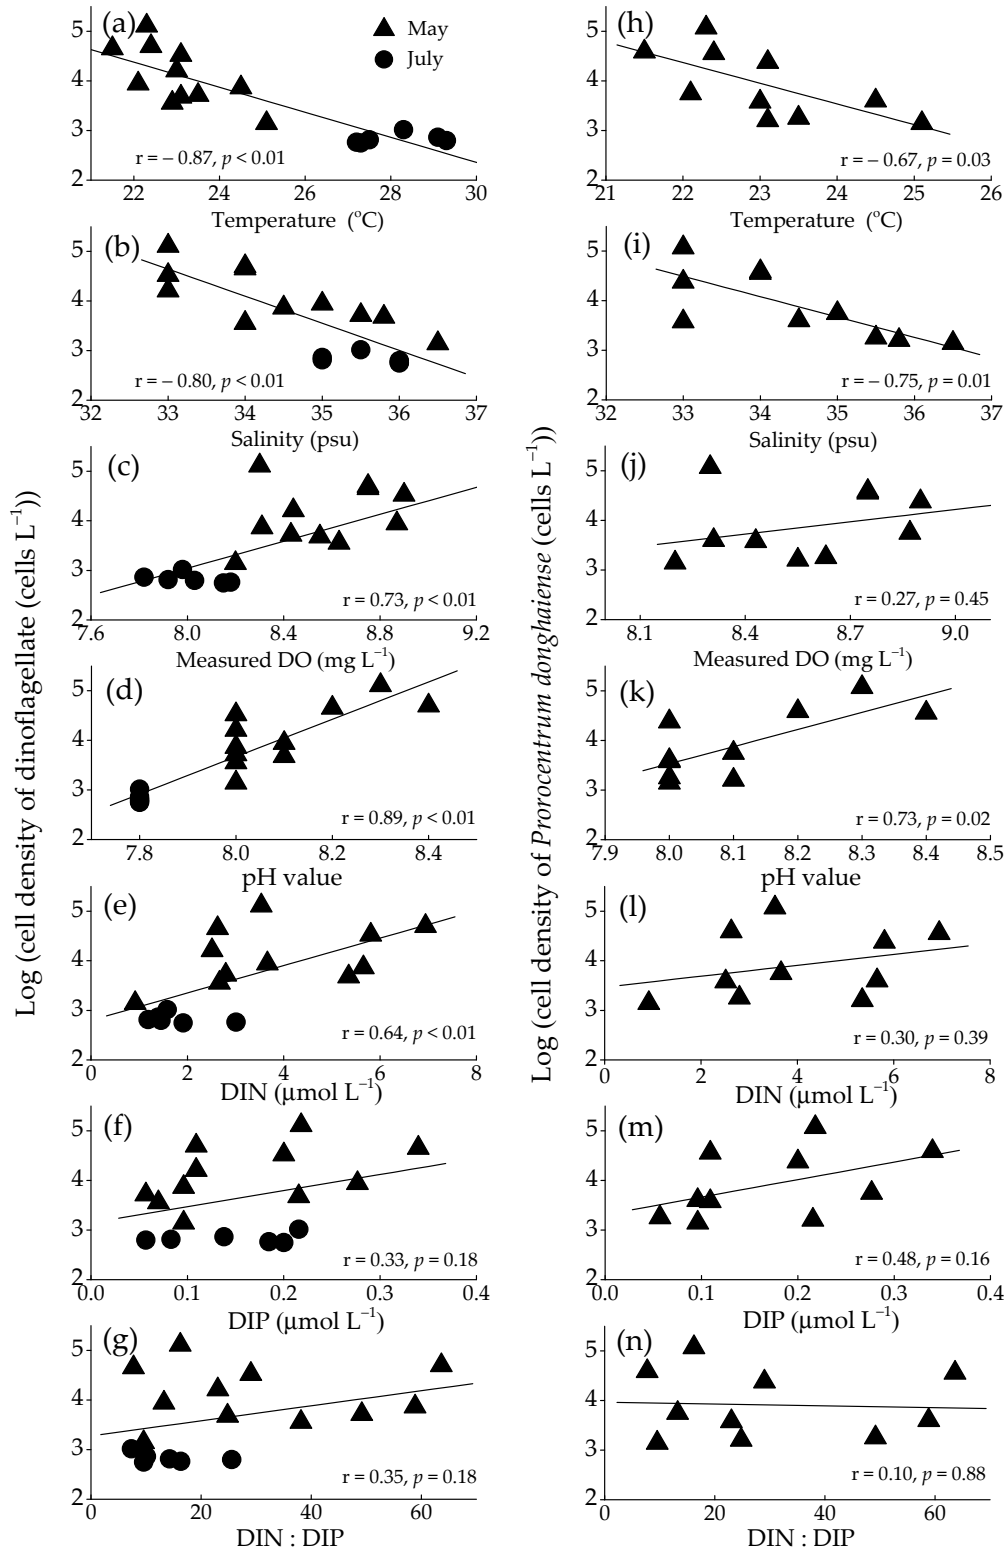

**Figure S1.** Correlations of cell density of dinoflagellates (left) or *Prorocentrum donghaiense* (right) with temperature (a, h), salinity (b, i), measured dissolved oxygen (DO) concentration (c, j), pH value (d, k), DIN concentration (e, l), DIP concentration (f, m), and DIN : DIP ratio (g, n) in the surface water of the Taiwan Strait during the cruises in May and July 2019.

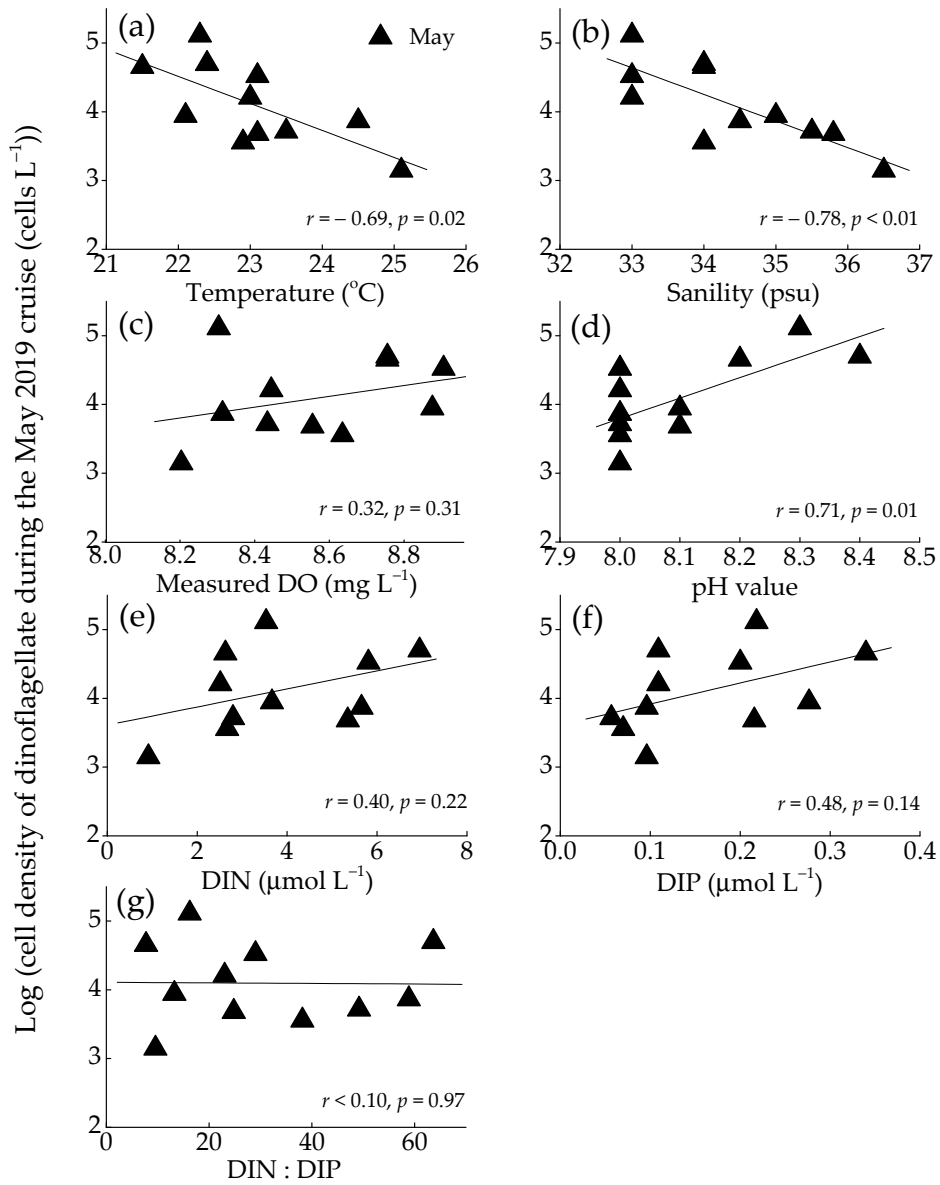

**Figure S2.** Correlations of cell density of dinoflagellates with temperature (a), salinity (b), measured dissolved oxygen (DO) concentration (c), pH value (d), DIN concentration (e), DIP concentration (f), and DIN : DIP ratio (g) in the surface water of the Taiwan Strait during the cruise in May 2019.

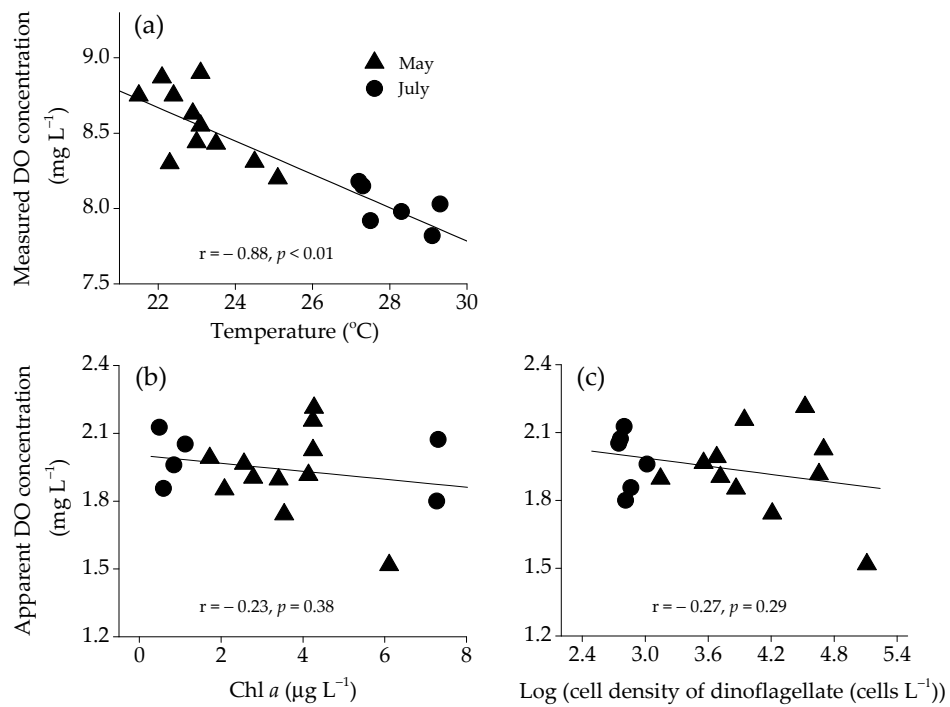

**Figure S3.** Correlation of measured dissolved oxygen (DO) concentration with temperature (a), and correlation of apparent DO concentration with chlorophyll *a* (Chl *a*) (b) or cell density (c) of dinoflagellate in the surface water of the Taiwan Strait during the cruises in May and July 2019. Apparent DO concentration was calculated as the difference between measured DO concentration and saturated DO concentration.
